# Supplementary material for: Chiraltube, rolling 2D materials into chiral nanotubes
Source: Royal Society of Chemistry journal article supplement (doi:10.1039/d3na00301a), 2023-10-11
Supplement: d3na00301a2.pdf [file d3na00301a2.pdf]

# Supplementary Information: Chiraltube, rolling 2d materials into chiral nanotubes

José de Albornoz Caratozzolo and Felipe Cervantes-Sodi\*

## 1 2D materials

- graphene

nat=2

```
CELL_PARAMETERS (angstrom)
  2.459512147  0.000000000  0.000000000
 -1.229756073  2.130000000  0.000000000
  0.000000000  0.000000000 10.000000000
```

```
ATOMIC_POSITIONS (angstrom)
C 1.229756073  0.71  5.0
C 0.000000000  1.42  5.0
```

- Phosphorene

nat=4

```
CELL_PARAMETERS (angstrom)
  4.62000  0.00000  0.00000
  0.00000  3.30000  0.00000
  0.00000  0.00000 10.00000
```

```
ATOMIC_POSITIONS (angstrom)
P 0.0000 0.00 3.93
P 1.1088 3.30 6.07
P 2.5872 1.65 6.07
P 3.1416 1.65 3.93
```

- MoS<sub>2</sub>

nat=3

```
CELL_PARAMETERS (angstrom)
```

```
3.181079696 0.000000000 0.000000000
-1.590540237 2.754889038 0.000000000
0.000000000 0.000000000 10.000000000
```

ATOMIC\_POSITIONS (angstrom)

```
S 1.5905260315876495465 0.9182342920325894154 6.565586833
S 1.5905260315876495465 0.9182342920325894154 3.434413167
Mo 0.0000142401699290626 1.8365313040729291692 5.00000000000
```

- $\text{Ti}_3\text{C}_2$

nat=5

CELL\_PARAMETERS (angstrom)

```
3.0700 0.00000 0.00000
-1.5350 2.65900 0.00000
0.00000 0.00000 15.13100
```

ATOMIC\_POSITIONS (angstrom)

```
C 0.000000000 1.7724623240 6.264234069
C 1.535043586 0.8861571658 8.866765931
Ti 1.535043586 0.8861571658 5.192959623
Ti 0.000000000 1.7724623240 9.938040377
Ti 0.000000000 0.000000000 7.565500000
```

## 2 Special XYZ format

Example of input file for  $\text{MoS}_2$

```
3
####1 row with text####
S 1.5905260315876495465 0.9182342920325894154 6.565586833
S 1.5905260315876495465 0.9182342920325894154 3.434413167
Mo 0.0000142401699290626 1.8365313040729291692 5.000000000000
alat
1.0
mass S 28.09
mass Mo 95.95
supercell
3.181079696 0.000000000 0.000000000
-1.590540237 2.754889038 0.000000000
0.000000000 0.000000000 10.000000000
cartesian coordinates
```

Example of output file in special \*.xyz format for  $\text{MoS}_2$  NT(8,4).

NT (n,m) =(8,4). z=14.5775058, r=5.358011. T (x,y)=(4,5)

|    |                        |                        |                     |
|----|------------------------|------------------------|---------------------|
| S  | 6.750006046473265      | 1.5406572141585868     | 1.3882707683979134  |
| S  | 3.6973386564148045     | 0.8439002031959805     | 1.3882707683979134  |
| S  | 6.535062662626825      | 2.2867361619796274     | 4.512022007241599   |
| S  | 3.5796026904668525     | 1.2525674718656548     | 4.512022007241599   |
| Mo | 5.358010951160183      | 4.066422065634832e-05  | 4.859115333668328   |
| S  | 4.895713062587455      | 4.895732824386468      | 2.4295211813458093  |
| S  | 2.681643398893984      | 2.6816542234862744     | 2.4295211813458093  |
| Mo | 4.827384694754795      | 2.324787810371771      | 2.7766145077725364  |
| S  | 2.286709782895769      | 6.5350718930837575     | 0.34702035545001864 |
| S  | 1.2525530226331951     | 3.579607746480876      | 0.34702035545001864 |
| Mo | 3.3406379973584603     | 4.189083327532513      | 0.6941136818767462  |
| S  | 6.923597784260712      | 2.7289008258031143e-05 | 9.718274071981078   |
| S  | 3.792424118285034      | 1.4947646629199356e-05 | 9.718274071981078   |
| S  | 6.237935867908364      | 3.0040576537122012     | 7.635773246085286   |
| S  | 3.4168504830753976     | 1.6454827466372508     | 7.635773246085286   |
| Mo | 5.324315855471739      | 0.5999516860366897     | 7.982866572512014   |
| S  | 4.316777224026051      | 5.413098990143675      | 5.553272420189495   |
| S  | 2.364529333993942      | 2.965043291733801      | 5.553272420189495   |
| Mo | 4.536735114216091      | 2.8506693701383075     | 5.900365746616224   |
| S  | 1.5406299674524693     | 6.75001226534826       | 3.4707715942937054  |
| S  | 0.8438852787204918     | 3.6973420628246294     | 3.4707715942937054  |
| Mo | 2.85060050739085       | 4.5367783835745215     | 3.817864920720433   |
| S  | -1.5406572141585846    | 6.750006046473266      | 1.3882707683979147  |
| S  | -0.8439002031959791    | 3.697338656414805      | 1.3882707683979147  |
| Mo | 0.599870868979052      | 5.324324961434673      | 1.735364094824642   |
| S  | 6.880059960253494      | 0.7752297867608295     | 12.842025310824766  |
| S  | 3.768576127837354      | 0.42463473935591434    | 12.842025310824766  |
| S  | 5.862362258998291      | 3.683600823004169      | 10.759524484928974  |
| S  | 3.2111287677181264     | 2.0177048174365138     | 10.759524484928974  |
| Mo | 5.223663415966982      | 1.1923178565693706     | 11.1066178113557    |
| S  | 3.683554610484816      | 5.862391296266447      | 8.677023659033182   |
| S  | 2.017679504372638      | 3.2111446729800317     | 8.677023659033182   |
| Mo | 4.189032620008876      | 3.340701582438573      | 9.02411698545991    |
| S  | 0.7751755519244621     | 6.880066071097221      | 6.594522833137392   |
| S  | 0.4246050320407438     | 3.768579475072687      | 6.594522833137392   |
| Mo | 2.3247145359586825     | 4.827419981802747      | 6.94161615956412    |
| S  | -2.28673616197963      | 6.535062662626825      | 4.512022007241602   |
| S  | -1.2525674718656563    | 3.579602690466852      | 4.512022007241602   |
| Mo | -4.066422065739496e-05 | 5.358010951160183      | 4.8591153336683295  |
| S  | -4.895732824386468     | 4.895713062587455      | 2.4295211813458115  |
| S  | -2.6816542234862744    | 2.681643398893984      | 2.4295211813458115  |
| Mo | -2.3247878103717707    | 4.827384694754795      | 2.7766145077725386  |
| S  | -6.535071893083757     | 2.286709782895769      | 0.3470203554500193  |
| S  | -3.5796077464808755    | 1.2525530226331953     | 0.3470203554500193  |
| Mo | -4.189083327532513     | 3.3406379973584603     | 0.6941136818767482  |
| S  | 5.413064961260079      | 4.316819894800218      | 13.88327572377266   |

|    |                         |                        |                    |
|----|-------------------------|------------------------|--------------------|
| S  | 2.965024652297645       | 2.364552707054905      | 13.88327572377266  |
| Mo | 5.057319414049724       | 1.7696897181940607     | 14.230369050199387 |
| S  | 3.004008480605437       | 6.237959548395224      | 11.80077489787687  |
| S  | 1.6454558119016012      | 3.4168634541422183     | 11.80077489787687  |
| Mo | 3.7886498369139483      | 3.7887219174357374     | 12.147868224303597 |
| S  | -2.728900825823654e-05  | 6.923597784260712      | 9.718274071981078  |
| S  | -1.4947646629311864e-05 | 3.792424118285034      | 9.718274071981078  |
| Mo | 1.769593501340136       | 5.057353081842396      | 10.065367398407806 |
| S  | -3.004057653712199      | 6.237935867908365      | 7.635773246085288  |
| S  | -1.64548274663725       | 3.4168504830753976     | 7.635773246085288  |
| Mo | -0.5999516860366892     | 5.324315855471739      | 7.982866572512016  |
| S  | -5.413098990143673      | 4.316777224026054      | 5.553272420189498  |
| S  | -2.9650432917338        | 2.3645293339939433     | 5.553272420189498  |
| Mo | -2.8506693701383075     | 4.536735114216091      | 5.900365746616225  |
| S  | -6.750012265348259      | 1.540629967452474      | 3.4707715942937067 |
| S  | -3.697342062824629      | 0.8438852787204945     | 3.4707715942937067 |
| Mo | -4.53677838357452       | 2.8506005073908525     | 3.8178649207204343 |
| S  | -6.750006046473266      | -1.5406572141585826    | 1.3882707683979154 |
| S  | -3.697338656414805      | -0.8439002031959781    | 1.3882707683979154 |
| Mo | -5.324324961434673      | 0.5998708689790546     | 1.7353640948246434 |
| S  | -0.7752297867608297     | 6.880059960253494      | 12.842025310824766 |
| S  | -0.4246347393559144     | 3.768576127837354      | 12.842025310824766 |
| Mo | 1.1922184750913623      | 5.223686099112086      | 13.189118637251493 |
| S  | -3.683600823004167      | 5.862362258998292      | 10.759524484928974 |
| S  | -2.0177048174365124     | 3.2111287677181273     | 10.759524484928974 |
| Mo | -1.1923178565693688     | 5.223663415966983      | 11.1066178113557   |
| S  | -5.862391296266445      | 3.68355461048482       | 8.677023659033184  |
| S  | -3.2111446729800304     | 2.0176795043726403     | 8.677023659033184  |
| Mo | -3.340701582438571      | 4.189032620008879      | 9.024116985459912  |
| S  | -6.88006607109722       | 0.7751755519244686     | 6.594522833137393  |
| S  | -3.7685794750726864     | 0.4246050320407474     | 6.594522833137393  |
| Mo | -4.827419981802745      | 2.324714535958686      | 6.94161615956412   |
| S  | -6.535062662626827      | -2.286736161979624     | 4.512022007241602  |
| S  | -3.5796026904668534     | -1.252567471865653     | 4.512022007241602  |
| Mo | -5.358010951160183      | -4.066422065230801e-05 | 4.859115333668329  |
| S  | -4.895713062587459      | -4.895732824386464     | 2.4295211813458106 |
| S  | -2.6816433988939865     | -2.6816542234862717    | 2.4295211813458106 |
| Mo | -4.827384694754798      | -2.324787810371766     | 2.776614507725386  |
| S  | -2.286709782895776      | -6.535071893083755     | 0.3470203554500202 |
| S  | -1.252553022633199      | -3.5796077464808747    | 0.3470203554500202 |
| Mo | -3.340637997358466      | -4.189083327532509     | 0.6941136818767468 |
| S  | -4.316819894800216      | 5.41306496126008       | 13.883275723772663 |
| S  | -2.3645527070549037     | 2.965024652297646      | 13.883275723772663 |
| Mo | -1.7696897181940634     | 5.057319414049724      | 14.23036905019939  |
| S  | -6.237959548395224      | 3.004008480605437      | 11.80077489787687  |
| S  | -3.4168634541422183     | 1.6454558119016014     | 11.80077489787687  |
| Mo | -3.7887219174357383     | 3.7886498369139483     | 12.147868224303599 |
| S  | -6.923597784260712      | -2.728900825781259e-05 | 9.71827407198108   |

|    |                        |                         |                     |
|----|------------------------|-------------------------|---------------------|
| S  | -3.792424118285034     | -1.4947646629079643e-05 | 9.71827407198108    |
| Mo | -5.057353081842396     | 1.7695935013401363      | 10.065367398407808  |
| S  | -6.237935867908367     | -3.004057653712196      | 7.635773246085289   |
| S  | -3.4168504830753985    | -1.6454827466372481     | 7.635773246085289   |
| Mo | -5.324315855471739     | -0.5999516860366854     | 7.982866572512016   |
| S  | -4.316777224026055     | -5.413098990143673      | 5.553272420189499   |
| S  | -2.3645293339939437    | -2.9650432917338        | 5.553272420189499   |
| Mo | -4.536735114216091     | -2.8506693701383066     | 5.900365746616226   |
| S  | -1.5406299674524744    | -6.750012265348259      | 3.4707715942937067  |
| S  | -0.8438852787204947    | -3.697342062824629      | 3.4707715942937067  |
| Mo | -2.8506005073908547    | -4.536778383574518      | 3.8178649207204347  |
| S  | 1.540657214158579      | -6.750006046473267      | 1.3882707683979172  |
| S  | 0.8439002031959763     | -3.6973386564148054     | 1.3882707683979172  |
| Mo | -0.5998708689790574    | -5.324324961434673      | 1.7353640948246438  |
| S  | -6.880059960253494     | -0.7752297867608262     | 12.842025310824766  |
| S  | -3.768576127837354     | -0.4246347393559125     | 12.842025310824766  |
| Mo | -5.2236860991120855    | 1.192218475091366       | 13.189118637251493  |
| S  | -5.862362258998296     | -3.6836008230041615     | 10.759524484928976  |
| S  | -3.211128767718129     | -2.0177048174365093     | 10.759524484928976  |
| Mo | -5.223663415966984     | -1.1923178565693626     | 11.106617811355703  |
| S  | -3.683554610484823     | -5.862391296266443      | 8.677023659033184   |
| S  | -2.017679504372642     | -3.2111446729800295     | 8.677023659033184   |
| Mo | -4.189032620008881     | -3.340701582438569      | 9.024116985459912   |
| S  | -0.7751755519244721    | -6.880066071097219      | 6.594522833137394   |
| S  | -0.4246050320407493    | -3.768579475072686      | 6.594522833137394   |
| Mo | -2.3247145359586905    | -4.827419981802742      | 6.941616159564121   |
| S  | 2.286736161979623      | -6.535062662626827      | 4.512022007241603   |
| S  | 1.2525674718656525     | -3.5796026904668534     | 4.512022007241603   |
| Mo | 4.0664220651979926e-05 | -5.358010951160183      | 4.8591153336683295  |
| S  | 4.895732824386458      | -4.895713062587465      | 2.4295211813458115  |
| S  | 2.681654223486269      | -2.6816433988939887     | 2.4295211813458115  |
| Mo | 2.3247878103717614     | -4.8273846947548        | 2.776614507772539   |
| S  | 6.535071893083753      | -2.286709782895782      | 0.34702035545002197 |
| S  | 3.5796077464808738     | -1.2525530226332022     | 0.34702035545002197 |
| Mo | 4.189083327532505      | -3.34063799735847       | 0.6941136818767486  |
| S  | -5.41306496126008      | -4.316819894800216      | 13.883275723772663  |
| S  | -2.965024652297646     | -2.3645527070549037     | 13.883275723772663  |
| Mo | -5.057319414049725     | -1.7696897181940585     | 14.23036905019939   |
| S  | -3.00400848060544      | -6.237959548395223      | 11.800774897876872  |
| S  | -1.6454558119016032    | -3.4168634541422174     | 11.800774897876872  |
| Mo | -3.788649836913952     | -3.7887219174357347     | 12.147868224303599  |
| S  | 2.7289008251239257e-05 | -6.923597784260712      | 9.71827407198108    |
| S  | 1.4947646625479076e-05 | -3.792424118285034      | 9.71827407198108    |
| Mo | -1.7695935013401414    | -5.057353081842394      | 10.065367398407808  |
| S  | 3.004057653712198      | -6.237935867908366      | 7.63577324608529    |
| S  | 1.6454827466372495     | -3.416850483075398      | 7.63577324608529    |
| Mo | 0.5999516860366874     | -5.324315855471739      | 7.982866572512018   |
| S  | 5.413098990143668      | -4.316777224026059      | 5.553272420189499   |

|    |                    |                      |                    |
|----|--------------------|----------------------|--------------------|
| S  | 2.965043291733797  | -2.364529333993946   | 5.553272420189499  |
| Mo | 2.8506693701383004 | -4.536735114216095   | 5.900365746616226  |
| S  | 6.750012265348257  | -1.540629967452481   | 3.4707715942937094 |
| S  | 3.697342062824628  | -0.8438852787204982  | 3.4707715942937094 |
| Mo | 4.536778383574518  | -2.850600507390855   | 3.817864920720435  |
| Mo | 5.324324961434673  | -0.5998708689790576  | 1.7353640948246447 |
| S  | 0.7752297867608197 | -6.880059960253494   | 12.842025310824766 |
| S  | 0.4246347393559089 | -3.7685761278373544  | 12.842025310824766 |
| Mo | -1.192218475091371 | -5.223686099112085   | 13.189118637251495 |
| S  | 3.6836008230041584 | -5.8623622589982975  | 10.759524484928976 |
| S  | 2.017704817436508  | -3.2111287677181304  | 10.759524484928976 |
| Mo | 1.1923178565693602 | -5.223663415966985   | 11.106617811355704 |
| S  | 5.862391296266442  | -3.683554610484823   | 8.677023659033186  |
| S  | 3.211144672980029  | -2.017679504372642   | 8.677023659033186  |
| Mo | 3.3407015824385686 | -4.189032620008881   | 9.024116985459912  |
| S  | 6.880066071097218  | -0.7751755519244786  | 6.594522833137395  |
| S  | 3.7685794750726855 | -0.42460503204075284 | 6.594522833137395  |
| Mo | 4.827419981802742  | -2.324714535958691   | 6.941616159564122  |
| S  | 4.3168198948002106 | -5.413064961260084   | 13.883275723772663 |
| S  | 2.3645527070549006 | -2.965024652297648   | 13.883275723772663 |
| Mo | 1.7696897181940536 | -5.057319414049727   | 14.23036905019939  |
| S  | 6.237959548395217  | -3.0040084806054517  | 11.800774897876872 |
| S  | 3.4168634541422143 | -1.6454558119016094  | 11.800774897876872 |
| Mo | 3.7887219174357276 | -3.7886498369139585  | 12.147868224303599 |
| Mo | 5.057353081842394  | -1.7695935013401416  | 10.065367398407808 |
| Mo | 5.223686099112085  | -1.1922184750913714  | 13.189118637251495 |

alat

1.0

supercell

10.716021902628983 0.0 0.0

0.0 10.716021902628983 0.0

0.0 0.0 14.577505781285105

cartesian coordinates

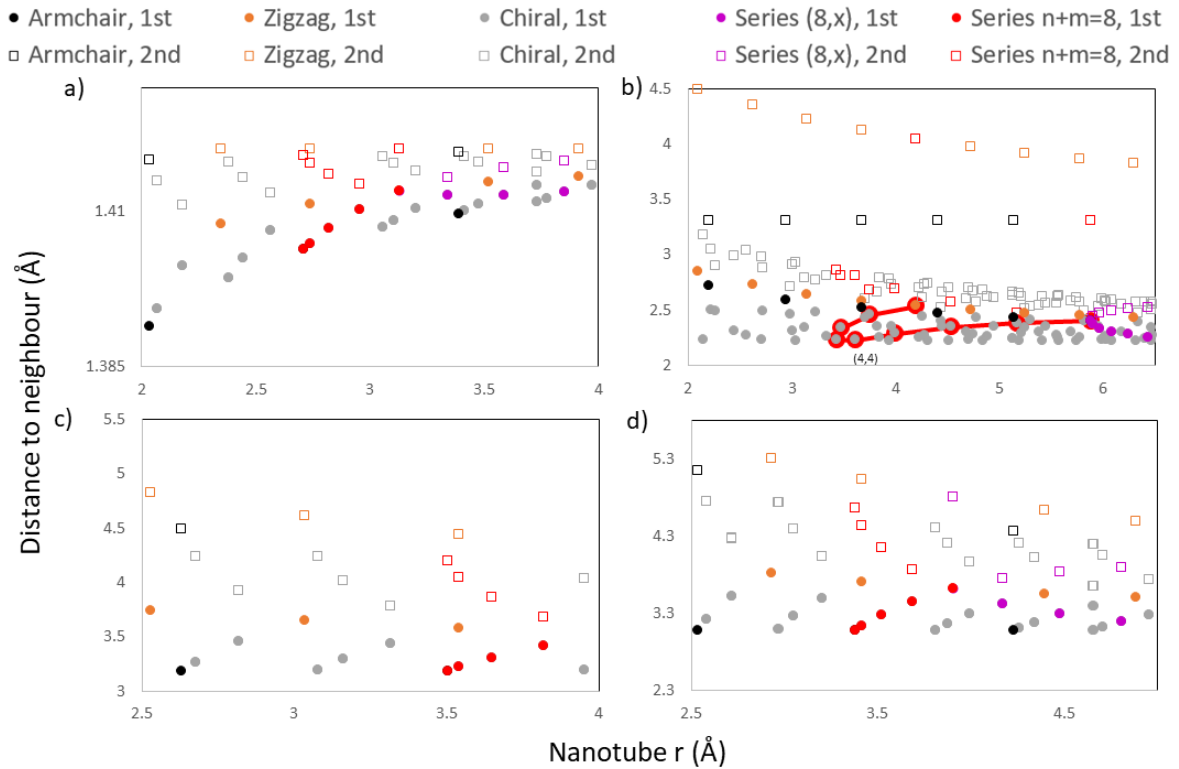

Supplementary Figure 1: Zoom of plots in figure 6 from main paper. Plots of 1st and 2nd neighbours of the outermost atomic layer for all the chiral and achiral nanotubes in a small radius region including the series  $n + m = 8$  for 4 different materials: **a)** SWCNTs, **b)** PNTs, **c)** MoS<sub>2</sub> NTs and **d)** Ti<sub>3</sub>C<sub>2</sub> NTs. In the case of PNTs, the families of  $(n, m) = X$  (with a fixed X), present a double trend that encounter at the point for the NT  $(X/2, X/2) = X$  as exemplified with the red line in the series  $m + n = 8$ , which two branches encounter at the value for (4, 4).
